# Supplementary material for: Characterization and Immunomodulatory Effects of High Molecular Weight Fucoidan Fraction from the Sporophyll of Undaria pinnatifida in Cyclophosphamide-Induced Immunosuppressed Mice
Source: PubMed Central journal article supplement (PMC6723532; doi:10.3390/md17080447), 2019-07-29
Supplement: marinedrugs-17-00447-s001.pdf [file marinedrugs-17-00447-s001.pdf]

**Table S1.** Quantitative reverse transcription polymerase chain reaction (qRT-PCR) primers.

| Origin | Marker                                | Sequence  |                                         |
|--------|---------------------------------------|-----------|-----------------------------------------|
| mouse  | Interleukin (IL)-1 $\beta$            | Sense     | 5'-CAA CCA ACA AGT GAT ATT CTC CAT G-3' |
|        |                                       | Antisense | 5'-GAT CCA CAC TCT CCA GCT GCA-3'       |
|        | Interleukin (IL)-2                    | Sense     | 5'-CCT GAG CAG GAT GGA GAA TTA CA-3'    |
|        |                                       | Antisense | 5'-TCC AGA ACA TGC CGC AGA G-3'         |
|        | Interleukin (IL)-4                    | Sense     | 5'-ACA GGA GAA GGG ACG CCA T-3'         |
|        |                                       | Antisense | 5'-GAA GCC CTA CAG ACG AGC TCA-3'       |
|        | Interleukin (IL)-5                    | Sense     | 5'-AGC ACA GTG GTG AAA GAG ACC TT-3'    |
|        |                                       | Antisense | 5'-TCC AAT GCA TAG CTG GTG ATT T-3'     |
|        | Interleukin (IL)-6                    | Sense     | 5'-TCC AGT TGC CTT CTT GGG AC-3'        |
|        |                                       | Antisense | 5'-GTG TAA TTA AGC CTC CGA CTT G-3'     |
|        | Interleukin (IL)-10                   | Sense     | 5'-GGT TGC CAA GCC TTA TCG GA-3'        |
|        |                                       | Antisense | 5'-ACC TGC TCC ACT GCC TTG CT-3'        |
|        | Interleukin (IL)-12                   | Sense     | 5'-TGG TTT GCC ATC GTT TTG CTG-3'       |
|        |                                       | Antisense | 5'-ACA GGT GAG GTT CAC TGT TTC T-3'     |
|        | Tumor necrosis factor (TNF)- $\alpha$ | Sense     | 5'-CAT CTT CTC AAA ATT CGA GTG ACA A-3' |
|        |                                       | Antisense | 5'-TGG GAG TAG ACA AGG TAC AAC CC-3'    |
|        | Interferon (IFN)- $\gamma$            | Sense     | 5'-TCA AGT GGC ATA GAT GTG GAA GAA-3'   |
|        |                                       | Antisense | 5'-TGG CTC TGC AGG ATT TTC ATG-3'       |
|        | RN18s (18S ribosomal RNA)             | Sense     | 5'-GTA ACC CGT TGA ACC CCA TT-3'        |
|        |                                       | Antisense | 5'-CCA TCC AAT CGG TAG TAG CG-3'        |
